# Supplementary material for: “Vaccinating your child during an emergency is more important than ever”: a randomised controlled trial on message framing among Ukrainian refugees in Poland, 2023
Source: PubMed Central journal article supplement (PMC11484345; doi:10.2807/1560-7917.es.2024.29.39.2400159), 2024-09-26
Supplement: 24-00159_WINTERS_Supplement.pdf [file 24-00159_WINTERS_Supplement.pdf]

# Supplementary material

"This supplementary material is hosted by *Eurosurveillance* as supporting information alongside the article “**Vaccinating your child during an emergency is more important than ever**”: a randomised controlled trial on message framing among Ukrainian refugees in Poland, 2023, on behalf of the authors, who remain responsible for the accuracy and appropriateness of the content. The same standards for ethics, copyright, attributions and permissions as for the article apply. Supplements are not edited by *Eurosurveillance* and the journal is not responsible for the maintenance of any links or email addresses provided therein."

**Supplementary Table S1. Trusted sources of vaccine information**

|                                                    | <b>Trusted<br/>N (%)</b> | <b>Not trusted<br/>N (%)</b> |
|----------------------------------------------------|--------------------------|------------------------------|
| <b>Trusted sources of information</b>              |                          |                              |
| Official health institutes                         | 1413 (74)                | 497 (26)                     |
| TV                                                 | 18 (1)                   | 1892 (99)                    |
| Radio                                              | 6 (0.3)                  | 1904 (99)                    |
| Newspapers                                         | 5 (0.3)                  | 1905 (99)                    |
| Social media                                       | 132 (7)                  | 1778 (93)                    |
| YouTube                                            | 16 (1)                   | 1894 (99)                    |
| Other parents from Ukraine living here             | 311 (16)                 | 1599 (84)                    |
| Doctors                                            | 1064 (56)                | 846 (44)                     |
| Family                                             | 135 (7)                  | 1775 (93)                    |
| Friends                                            | 110 (6)                  | 1800 (94)                    |
| I don't trust any of them                          | 88 (5)                   | 1822 (95)                    |
| <b>Greatest influence on decision to vaccinate</b> |                          |                              |
| Family                                             | 469 (25)                 | 1441 (75)                    |
| Friends                                            | 44 (2)                   | 1866 (98)                    |
| Other parents                                      | 83 (4)                   | 1827 (96)                    |

|                                     |          |           |
|-------------------------------------|----------|-----------|
| Religious leaders                   | 9 (0.5)  | 1901 (99) |
| Coworkers                           | 4 (0.2)  | 1906 (99) |
| School                              | 45 (2)   | 1865 (98) |
| Doctors or other healthcare workers | 790 (41) | 1120 (59) |
| Celebrities or other influencers    | 9 (0.5)  | 1901 (99) |
| Public health figures               | 379 (20) | 1531 (80) |
| None                                | 571 (30) | 1339 (70) |

**Supplementary Table S2. Intention to get a child vaccinated in Poland in the next 6 months by group**

|                 | <b>Intervention 1</b><br><b>Trust</b><br>N (%) | <b>Intervention 2</b><br><b>Access</b><br>N (%) | <b>Intervention 3</b><br><b>Risk Aversion</b><br>N (%) | <b>Control</b><br>N (%) | <b>Overall</b><br>N (%) |
|-----------------|------------------------------------------------|-------------------------------------------------|--------------------------------------------------------|-------------------------|-------------------------|
| <b>Baseline</b> |                                                |                                                 |                                                        |                         |                         |
| No/Not sure     | 229 (48)                                       | 261 (54)                                        | 243 (51)                                               | 240 (50)                | 973 (51)                |
| Yes             | 248 (52)                                       | 218 (46)                                        | 235 (49)                                               | 236 (50)                | 937 (49)                |
| <b>Outcome</b>  |                                                |                                                 |                                                        |                         |                         |
| No/Not sure     | 220 (46)                                       | 256 (53)                                        | 227 (47)                                               | 243 (51)                | 946 (50)                |

|     |          |          |          |          |          |
|-----|----------|----------|----------|----------|----------|
| Yes | 257 (54) | 223 (47) | 251 (53) | 233 (49) | 964 (50) |
|-----|----------|----------|----------|----------|----------|

**Supplementary Table S3. Post-hoc comparison between intervention groups for primary outcome: Intention to get a child vaccinated in Poland in the next 6 months**

|               | Access<br>OR (95% CI)<br>P-value | Trust<br>OR (95% CI)<br>P-value | Risk Aversion<br>OR (95% CI)<br>P-value |
|---------------|----------------------------------|---------------------------------|-----------------------------------------|
| Access        | -                                | 1.22 (0.65-2.28)<br>0.539       | 1.74 (0.95-3.19)<br>0.073               |
| Trust         | 0.82 (0.44-1.54)<br>0.539        | -                               | 1.43 (0.77-2.64)<br>0.255               |
| Risk aversion | 0.57 (0.31-1.05)<br>0.073        | 0.70 (0.38-1.29)<br>0.255       | -                                       |

**Supplementary Table S4. Clicking on a vaccination scheduling link by group**

|                  | Intervention 1<br>Trust<br>N (%) | Intervention 2<br>Access<br>N (%) | Intervention 3<br>Risk Aversion<br>N (%) | Control<br>N (%) | Overall<br>N (%) |
|------------------|----------------------------------|-----------------------------------|------------------------------------------|------------------|------------------|
| Clicking on link |                                  |                                   |                                          |                  |                  |
| Refuse           | 356 (75)                         | 347 (72)                          | 331 (69)                                 | 358 (75)         | 1392 (73)        |
| Click            | 121 (25)                         | 132 (28)                          | 147 (31)                                 | 118 (25)         | 518 (27)         |

**Supplementary Table S5. Post-hoc comparison between intervention groups for primary outcome: Clicking on a vaccination scheduling link**

|               | Access<br>OR (95% CI)<br>P-value | Trust<br>OR (95% CI)<br>P-value | Risk Aversion<br>OR (95% CI)<br>P-value |
|---------------|----------------------------------|---------------------------------|-----------------------------------------|
| Access        | -                                | 0.84 (0.61-1.15)<br>0.278       | 1.19 (0.88-1.62)<br>0.257               |
| Trust         | 1.19 (0.87-1.63)<br>0.278        | -                               | 1.42 (1.04 -1.94)<br>0.028              |
| Risk aversion | 0.84 (0.62-1.14)<br>0.257        | 0.70 (0.52-0.96)<br>0.028       | -                                       |

**Supplementary Table S6. Block-wise analysis of determinants of vaccination intentions**

|                                                   | <b>Adjusted* OR<br/>(95% CI)</b> | <b>P-value</b> |
|---------------------------------------------------|----------------------------------|----------------|
| <b>Block 1: Thinking and Feeling</b>              |                                  |                |
| <b>Education mother</b>                           |                                  |                |
| Primary/Secondary                                 |                                  |                |
| Vocational                                        | 0.85 (0.60-1.20)                 | 0.354          |
| Reference                                         | 0.89 (0.67-1.18)                 | 0.403          |
| <b>Importance of vaccination</b>                  |                                  |                |
|                                                   | 1.30 (1.25-1.35)                 | 0.000          |
| <b>Likelihood of returning to Ukraine</b>         |                                  |                |
| Not return                                        | Reference                        | -              |
| Return                                            | 0.42 (0.33-0.54)                 | 0.000          |
| Not sure                                          | 0.55 (0.43-0.71)                 | 0.000          |
| <b>Block 2: Social Processes</b>                  |                                  |                |
| <b>Vaccination as social norm</b>                 |                                  |                |
| No                                                | Reference                        | -              |
| Yes                                               | 1.43 (1.16-1.76)                 | 0.001          |
| <b>Trust in healthcare providers</b>              |                                  |                |
| No trust                                          | 0.12 (0.05-0.25)                 | 0.000          |
| Somewhat                                          | 0.29 (0.21-0.42)                 | 0.000          |
| Mostly                                            | 0.59 (0.46-0.75)                 | 0.000          |
| Fully                                             | Reference                        | -              |
| <b>Trusted vaccination info sources</b>           |                                  |                |
| Official health institute                         | 1.45 (1.14-1.85)                 | 0.001          |
| Social media                                      | 2.00 (1.33-3.01)                 | 0.001          |
| Other Ukrainian parents in Poland                 | 0.94 (0.71-1.24)                 | 0.646          |
| Doctors                                           | 1.36 (1.10-1.69)                 | 0.005          |
| Family                                            | 0.85 (0.55-1.32)                 | 0.476          |
| Friends                                           | 0.76 (0.47-1.24)                 | 0.274          |
| <b>Greatest influence on vaccination decision</b> |                                  |                |
| Family                                            | 1.08 (0.82-1.40)                 | 0.593          |
| Doctors/other healthcare workers                  | 0.89 (0.69-1.16)                 | 0.390          |
| Public health figures                             | 0.81 (0.62-1.06)                 | 0.125          |
| No one                                            | 1.05 (0.77-1.42)                 | 0.772          |
| <b>Block 3: Practical Issues</b>                  |                                  |                |
| <b>Polish language</b>                            |                                  |                |
| None                                              | Reference                        | -              |
| Low                                               | 1.17 (0.78-1.77)                 | 0.453          |
| Medium                                            | 1.06 (0.69-1.62)                 | 0.783          |
| High                                              | 1.85 (1.01-3.40)                 | 0.046          |
| <b>Possession vaccination card</b>                |                                  |                |
| No                                                | Reference                        | -              |
| Yes                                               | 1.90 (1.48-2.43)                 | 0.000          |
| <b>Healthcare coverage in Poland</b>              |                                  |                |
| No                                                | Reference                        | -              |
| Yes                                               | 1.04 (0.83-1.29)                 | 0.739          |

|                                                                                                  |                  |       |
|--------------------------------------------------------------------------------------------------|------------------|-------|
| <b>Healthcare seeking</b>                                                                        |                  |       |
| I can't access healthcare                                                                        | Reference        | -     |
| To a non-Ukrainian doctor in Poland                                                              | 1.39 (0.64-3.02) | 0.411 |
| To a Ukrainian doctor in Poland                                                                  | 1.10 (0.49-2.48) | 0.815 |
| To a doctor in Ukraine                                                                           | 0.54 (0.23-1.29) | 0.166 |
| <b>Moderator</b>                                                                                 |                  |       |
| <b>Age of child</b>                                                                              | 0.74 (0.71-0.77) | 0.000 |
| OR = Odds Ratio, CI = Confidence Interval<br>*Adjusted for the other variables in the same block |                  |       |

**Supplementary Figure S1. BeSD-informed framework of potential determinants of intention to vaccinate**

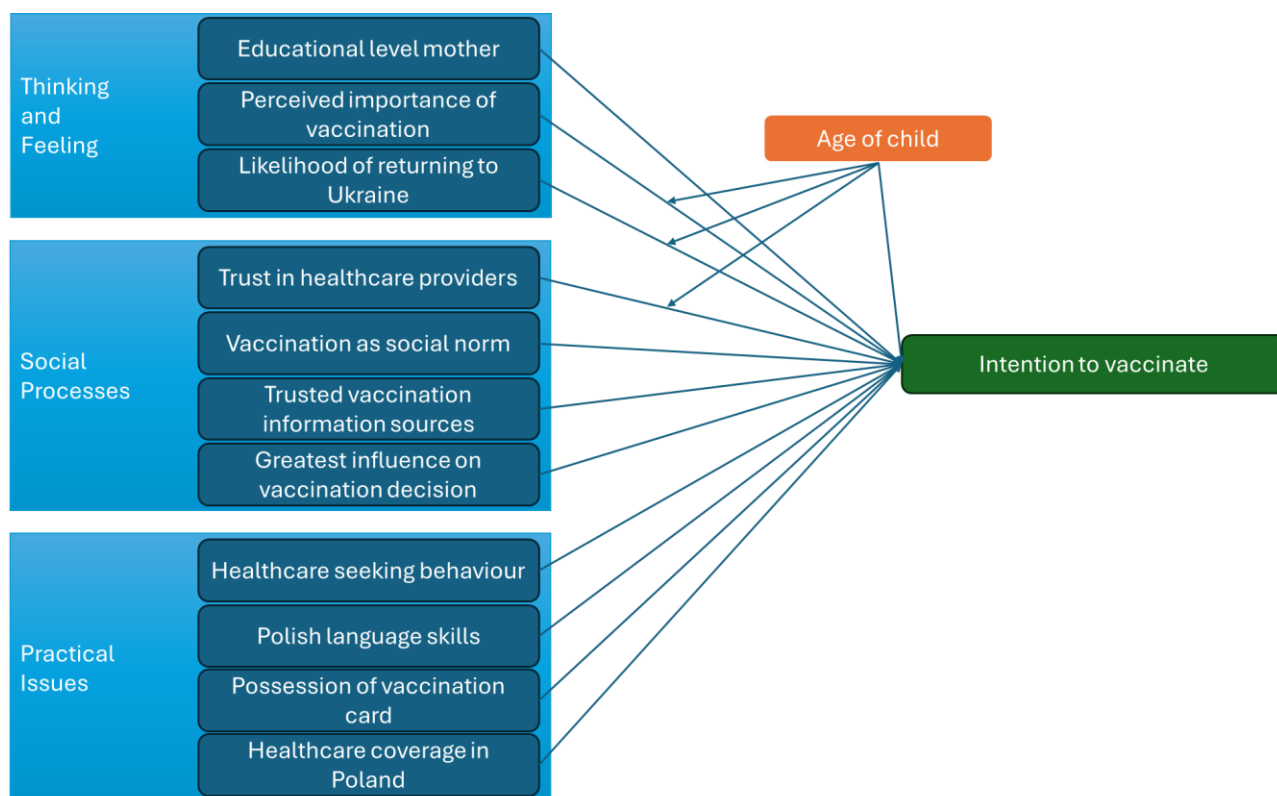

**Full survey (in Ukrainian and English)**

|                                                                                                                                                                                                                               |                                                                                                                                                                                                                   |
|-------------------------------------------------------------------------------------------------------------------------------------------------------------------------------------------------------------------------------|-------------------------------------------------------------------------------------------------------------------------------------------------------------------------------------------------------------------|
| <p><b>1. Are you a mother of a child under the age of 7 years?</b></p> <p>1. Yes<br/>2. No --&gt; end of survey</p>                                                                                                           | <p><b>1. Чи є у Вас діти віком до 7 років включно?</b></p> <p>1. Так<br/>2. Ні --&gt; кінець опитування</p>                                                                                                       |
| <p><b>2. How old is your youngest child?</b></p> <p>1. Less than 1 year old<br/>2. 1 year old<br/>3. 2 years old<br/>4. 3 years old<br/>5. 4 years old<br/>6. 5 years<br/>7. 6 years<br/>8. 7 years</p>                       | <p><b>2. Скільки років вашій наймолодшій дитині?</b></p> <p>1. Менше 1 року<br/>2. 1 рік<br/>3. 2 роки<br/>4. 3 роки<br/>5. 4 роки<br/>6. 5 років<br/>7. 6 років<br/>8. 7 років</p>                               |
| <p><b>3. What is your level of education?</b></p> <p>1. Primary education<br/>2. Completed secondary education<br/>3. Completed vocational/technical<br/>4. Incomplete higher education<br/>5. Higher / scientific degree</p> | <p><b>3. Вкажіть рівень Вашої освіти</b></p> <p>1. Початкова освіта<br/>2. Повна середня освіта<br/>3. Повна професійно-технічна освіта<br/>4. Неповна вища освіта<br/>5. Повна вища освіта/ науковий ступінь</p> |
| <p><b>4. What is your age? _____</b></p>                                                                                                                                                                                      | <p><b>4. Скільки Вам років? _____</b></p>                                                                                                                                                                         |

|                                                                                                                                                                                          |                                                                                                                                                                                                     |
|------------------------------------------------------------------------------------------------------------------------------------------------------------------------------------------|-----------------------------------------------------------------------------------------------------------------------------------------------------------------------------------------------------|
| <p><b>5. Do you currently work in Poland?</b></p> <p>1. Yes<br/>2. No<br/>99. I prefer not to say</p>                                                                                    | <p><b>5. Чи працюєте Ви зараз у Польщі?</b></p> <p>1. Так<br/>2. Ні<br/>99. Не хочу відповідати</p>                                                                                                 |
| <p><b>6. How would you assess your level of Polish language proficiency?</b></p> <p>1. High<br/>2. Medium<br/>3. Low<br/>4. I do not speak Polish at all<br/>99. I prefer not to say</p> | <p><b>6. Як Ви можете оцінити свій рівень володіння польською мовою?</b></p> <p>1. Високий<br/>2. Середній<br/>3. Низький<br/>4. Не володію польською мовою взагалі<br/>99. Не хочу відповідати</p> |



|                                             |                                                                                                    |
|---------------------------------------------|----------------------------------------------------------------------------------------------------|
| <p><b>7. Drop down: List of oblasts</b></p> | <p><b>7. В якій області Ви проживали до початку повномасштабної війни 24 лютого 2022 року?</b></p> |
| <p>1. Vinnytsia</p>                         | <p>1. Вінницька</p>                                                                                |
| <p>2. Volyn</p>                             | <p>2. Волинська</p>                                                                                |
| <p>3. Dnipropetrovsk</p>                    | <p>3. Дніпропетровська</p>                                                                         |
| <p>4. Donetsk</p>                           | <p>4. Донецька</p>                                                                                 |
| <p>5. Zhytomyr</p>                          | <p>5. Житомирська</p>                                                                              |
| <p>6. Zakarpattia</p>                       | <p>6. Закарпатська</p>                                                                             |
| <p>7. Zaporizhzhia</p>                      | <p>7. Запорізька</p>                                                                               |
| <p>8. Ivano-Frankivsk</p>                   | <p>8. Івано-Франківська</p>                                                                        |
| <p>9. Kyiv oblast</p>                       | <p>9. Київська</p>                                                                                 |
| <p>10. Kirovohrad</p>                       | <p>10. Кіровоградська</p>                                                                          |
| <p>11. Luhansk</p>                          | <p>11. Луганська</p>                                                                               |
| <p>12. Lviv</p>                             | <p>12. Львівська</p>                                                                               |
| <p>13. Mykolaiv</p>                         | <p>13. Миколаївська</p>                                                                            |
| <p>14. Odesa</p>                            | <p>14. Одеська</p>                                                                                 |
| <p>15. Poltava</p>                          | <p>15. Полтавська</p>                                                                              |
| <p>16. Rivne</p>                            | <p>16. Рівненська</p>                                                                              |
| <p>17. Sumy</p>                             | <p>17. Сумська</p>                                                                                 |
| <p>18. Ternopil</p>                         | <p>18. Тернопільська</p>                                                                           |
| <p>19. Kharkiv</p>                          | <p>19. Харківська</p>                                                                              |
| <p>20. Kherson</p>                          | <p>20. Херсонська</p>                                                                              |
| <p>21. Khmelnytskyi</p>                     | <p>21. Хмельницька</p>                                                                             |
| <p>22. Cherkasy</p>                         | <p>22. Черкаська</p>                                                                               |
| <p>23. Chernivtsi</p>                       | <p>23. Чернівецька</p>                                                                             |
| <p>24. Chernihiv</p>                        | <p>24. Чернігівська</p>                                                                            |
| <p>25. Kyiv</p>                             | <p>25. м. Київ</p>                                                                                 |

|  |  |
|--|--|
|  |  |
|--|--|

|                                                  |                                                                   |
|--------------------------------------------------|-------------------------------------------------------------------|
| <p>3. Where in Poland do you currently live?</p> | <p>3. Де Ви зараз проживаєте у Польщі?<br/>Оберіть воєводство</p> |
| <p>Drop down: List of provinces</p>              |                                                                   |
| <p>1. Masovia</p>                                | <p>1. Мазовецьке (центр Варшава)</p>                              |
| <p>2. Lower Silesia</p>                          | <p>2. Нижньосілезьке (Вроцлав)</p>                                |
| <p>3. Kuyavia-Pomerania</p>                      | <p>3. Куявсько-Поморське (Бидгош, Торунь)</p>                     |
| <p>4. Lublin</p>                                 | <p>4. Люблінське (Люблін)</p>                                     |
| <p>5. Lubusz</p>                                 | <p>5. Любуське (Гожув, Зелена Гура)</p>                           |
| <p>6. Łódź</p>                                   | <p>6. Лодзинське (Лодзь)</p>                                      |
| <p>7. Lesser Poland</p>                          | <p>7. Малопольське (Краків)</p>                                   |
| <p>8. Opole</p>                                  | <p>8. Опольське (Ополе)</p>                                       |
| <p>9. Subcarpathia</p>                           | <p>9. Підкарпатське (Жешув)</p>                                   |
| <p>10. Podlasie</p>                              | <p>10. Підляське (Білосток)</p>                                   |
| <p>11. Pomerania</p>                             | <p>11. Поморське (Гданськ)</p>                                    |
| <p>12. Świętokrzyskie Voivodeship</p>            | <p>12. Свентокшиське (Кельці)</p>                                 |
| <p>13. Silesia</p>                               | <p>13. Сілезьке (Катовиці)</p>                                    |
| <p>14. Greater Poland</p>                        | <p>14. Великопольське (Познань)</p>                               |
| <p>15. Warmia-Masuria</p>                        | <p>15. Вармінсько-Мазурське (Ольштин)</p>                         |
| <p>16. West Pomerania</p>                        | <p>16. Західнопоморське (Щецин)</p>                               |

|                                                                                                                                                                                                                                         |                                                                                                                                                                                                                                       |
|-----------------------------------------------------------------------------------------------------------------------------------------------------------------------------------------------------------------------------------------|---------------------------------------------------------------------------------------------------------------------------------------------------------------------------------------------------------------------------------------|
| <p><b>BeSD Question (adapted)</b></p> <p>9. I think it's important to vaccinate my child</p> <p>0: I strongly disagree</p> <p>1</p> <p>2</p> <p>3</p> <p>4</p> <p>5</p> <p>6</p> <p>7</p> <p>8</p> <p>9</p> <p>10: I strongly agree</p> | <p>9. Чи погоджуєтеся Ви з твердженням про те, що вакцинувати свою дитину важливо?</p> <p>0: Зовсім не погоджуюся</p> <p>1</p> <p>2</p> <p>3</p> <p>4</p> <p>5</p> <p>6</p> <p>7</p> <p>8</p> <p>9</p> <p>10: Повністю погоджуюся</p> |
| <p><b>BeSD Question</b></p> <p>10. Do you think most of your close family and friends want you to get your child vaccinated?</p> <p>1. Yes</p> <p>2. No</p> <p>99. Difficult to answer/Not sure</p>                                     | <p>10. Як ви думаєте, більшість вашої родини та друзів хочуть, щоб Ваша дитина була вакцинована?</p> <p>1. Так</p> <p>2. Ні</p> <p>99. Важко відповісти/Не впевнена</p>                                                               |
| <p><b>BeSD Question</b></p> <p>11. Do you know how to get your child vaccinated in Poland?</p> <p>1. Yes</p> <p>2. No</p>                                                                                                               | <p>11. Чи знаєте ви, як зробити щеплення своїй дитині в Польщі?</p> <p>1. Так</p> <p>2. Ні</p>                                                                                                                                        |

|                                                                                                                                                                                                                                                                                                                                                                                                                                                                                                                                                                                                                                                                                                                                                                                                                                                                                           |                                                                                                                                                                                                                                                                                                                                                                                                                                                                                                                                                                                                                                                                                                                                                                                                                                                                                        |
|-------------------------------------------------------------------------------------------------------------------------------------------------------------------------------------------------------------------------------------------------------------------------------------------------------------------------------------------------------------------------------------------------------------------------------------------------------------------------------------------------------------------------------------------------------------------------------------------------------------------------------------------------------------------------------------------------------------------------------------------------------------------------------------------------------------------------------------------------------------------------------------------|----------------------------------------------------------------------------------------------------------------------------------------------------------------------------------------------------------------------------------------------------------------------------------------------------------------------------------------------------------------------------------------------------------------------------------------------------------------------------------------------------------------------------------------------------------------------------------------------------------------------------------------------------------------------------------------------------------------------------------------------------------------------------------------------------------------------------------------------------------------------------------------|
| <p><b>BeSD Question</b></p> <p><b>12. Poland has a schedule of vaccines for children. As far as you know, has your child received none, some, or all of these vaccines?</b></p> <p>1. None<br/>2. Some<br/>3. All</p> <p>99. Difficult to answer/Not sure</p>                                                                                                                                                                                                                                                                                                                                                                                                                                                                                                                                                                                                                             | <p><b>12. У Польщі є календар вакцинації дітей. Чи отримувала ваша дитина щеплення згідно цього календаря</b></p> <p>1. Ні, не отримувала жодних щеплень<br/>2. Отримувала деякі щеплення<br/>3. Отримала усі щеплення</p> <p>99. Важко відповісти/Не впевнена</p>                                                                                                                                                                                                                                                                                                                                                                                                                                                                                                                                                                                                                     |
| <p><b>13. If some or none (if 12=1 or 2: what was the reason for your decision not to vaccinate your child? MULTIPLE RESPONSE</b></p> <p>1. I'm concerned about the safety and side effects of vaccines<br/>2. I don't have easy access to healthcare services in Poland<br/>3. I don't know the vaccine schedule/requirements in Poland<br/>4. I don't know where to get vaccinated in Poland<br/>5. I don't trust the healthcare system and/or medical authorities in Poland<br/>6. I don't believe my child needs to be vaccinated (don't believe on the threat of the diseases)<br/>7. I was advised by health provider not to receive the vaccines (contraindications, etc)<br/>8. I refuse to vaccinate my child due to my religious beliefs<br/>9. I prefer to vaccinate my child when back to Ukraine<br/>97. Other (please, specify)</p> <p>99. Difficult to answer/Not sure</p> | <p><b>13. Якщо дитина отримала деякі щеплення або жодних (якщо 12=1 або 2). Яка причина вашого рішення не вакцинувати Вашу дитину? МОЖЛИВО ДЕКІЛЬКА ВІДПОДІДЕЙ</b></p> <p>1. Я стурбована (-ний) безпечністю та побічними ефектами від вакцин<br/>2. Я не маю доступу до медичних послуг у Польщі<br/>3. Я не знаю графіку вакцинації/вимог в Польщі<br/>4. Я не знаю, де зробити щеплення в Польщі<br/>5. Я не довіряю системі охорони здоров'я та/або медичним органам у Польщі<br/>6. Я не думаю, що моїй дитині потрібно робити щеплення (не вірю в загрозу захворювань)<br/>7. Лікар порадив мені не робити щеплення (протипоказання тощо)<br/>8. Я відмовляюся робити щеплення своїй дитині через свої релігійні переконання<br/>9. Я вважаю за краще вакцинувати свою дитину, коли повернуся в Україну<br/>97. Інше (вказіть) _____</p> <p>99. Важко відповісти/Не впевнена</p> |

|                                                                                                                                                                                                                                                                                                                         |                                                                                                                                                                                                                                                                                                                                   |
|-------------------------------------------------------------------------------------------------------------------------------------------------------------------------------------------------------------------------------------------------------------------------------------------------------------------------|-----------------------------------------------------------------------------------------------------------------------------------------------------------------------------------------------------------------------------------------------------------------------------------------------------------------------------------|
| <p><b>BeSD Question</b></p> <p><b>14. How much do you trust the healthcare providers who vaccinate children?</b></p> <p>1. Do not trust<br/>2. Somewhat trust<br/>3. Mostly trust<br/>4. Fully trust</p> <p>99. Difficult to answer/Not sure</p>                                                                        | <p><b>14. Наскільки ви довіряєте медичним працівникам, які проводять вакцинацію дітей?</b></p> <p>1. Зовсім не довіряю<br/>2. Не дуже довіряю<br/>3. Переважно довіряю<br/>4. Повністю довіряю</p> <p>99. Важко відповісти/Не впевнена</p>                                                                                        |
| <p><b>15. What should vaccine providers do to better address your concerns, if anything? UP TO TWO ANSWERS</b></p> <p>1. Provide the information in my language<br/>2. Spend more time during the consultations<br/>3. Review my child vaccine records<br/>97. Other (specify)<br/>99. Difficult to answer/Not sure</p> | <p><b>15. Що з переліченого могло б покращити роботу медичних працівників, які вакцинують дітей? ОБЕРІТЬ ДО ДВОХ ВІДПОВІДЕЙ</b></p> <p>1. Надання інформації рідною для мене мовою<br/>2. Збільшення часу консультації<br/>3. Врахування попередніх щеплень моєї дитини<br/>97. Інше (вказіть) _____<br/>99. Важко відповісти</p> |
| <p><b>16. Do you have a vaccination passport (certificate) or any vaccination records of your children, and did you take it with you when leaving Ukraine?</b></p> <p>1. Yes, I have it (a copy or actual record)<br/>2. No, I don't have it (and I can't access it)<br/>99. I prefer not to answer</p>                 | <p><b>16. Чи є у вас паспорт (довідка) вакцинації або будь-які записи про щеплення Ваших дітей, і чи брали Ви їх, виїжджаючи з України?</b></p> <p>1. Так, маю (копія або оригінальний документ)<br/>2. Ні, не маю (і не можу отримати до них доступ)<br/>99. Не хочу відповідати</p>                                             |

|                                                                                                                                                                                                                              |                                                                                                                                                                                                                                   |
|------------------------------------------------------------------------------------------------------------------------------------------------------------------------------------------------------------------------------|-----------------------------------------------------------------------------------------------------------------------------------------------------------------------------------------------------------------------------------|
| <p><b>17. Did you have any issues with understanding or translating your vaccine records?</b></p> <p>1. Yes<br/>2. No<br/>99. I don't know</p>                                                                               | <p><b>17. Чи виникали у вас проблеми з розумінням або перекладом ваших записів про щеплення?</b></p> <p>1. Так<br/>2. Ні<br/>99. Важко відповісти</p>                                                                             |
| <p><b>18. Do you have any kind of health care coverage in Poland (health insurance, private health insurance, etc)?</b></p> <p>1. Yes<br/>2. No<br/>99. I don't know</p>                                                     | <p><b>18. Чи маєте ви медичну страховку в Польщі (державна або приватна)?</b></p> <p>1. Так<br/>2. Ні<br/>99. Важко відповісти</p>                                                                                                |
| <p><b>19. Have you encountered barriers when you tried to access vaccination services in Poland?</b></p> <p>1. I haven't tried to access<br/>2. No, we did not face any difficulties<br/>3. Yes (please, describe) _____</p> | <p><b>19. Чи стикалися ви з будь-якими труднощами, коли намагались зробити щеплення у Польщі?</b></p> <p>1. Не намагались зробити щеплення<br/>2. Ні, не стикались з труднощами<br/>3. Так (опишіть, які саме проблеми) _____</p> |
| <p><b>BeSD Question (adapted)</b></p> <p><b>20. Do you intend to vaccinate your child in the next 6 months in Poland?</b></p> <p>1. Yes<br/>2. No<br/>99. Difficult to answer/Not sure</p>                                   | <p><b>20. Чи маєте Ви намір вакцинувати свою дитину протягом наступних 6 місяців у Польщі?</b></p> <p>1. Так<br/>2. Ні<br/>99. Важко відповісти/Не впевнена</p>                                                                   |

|                                                                                                                                                                                                                                                                                                                                                                                                                                                                                                                                                             |                                                                                                                                                                                                                                                                                                                                                                                                                                                                                                                                                                                                                                            |
|-------------------------------------------------------------------------------------------------------------------------------------------------------------------------------------------------------------------------------------------------------------------------------------------------------------------------------------------------------------------------------------------------------------------------------------------------------------------------------------------------------------------------------------------------------------|--------------------------------------------------------------------------------------------------------------------------------------------------------------------------------------------------------------------------------------------------------------------------------------------------------------------------------------------------------------------------------------------------------------------------------------------------------------------------------------------------------------------------------------------------------------------------------------------------------------------------------------------|
| <p><b>21. Which source of vaccine information do you trust the most? MULTIPLE RESPONSE</b></p> <ol style="list-style-type: none"> <li>1. Official health institutes</li> <li>2. TV</li> <li>3. Radio</li> <li>4. Newspapers</li> <li>5. Social media</li> <li>6. YouTube</li> <li>7. Other parents from Ukraine living here</li> <li>8. Doctors</li> <li>9. Family</li> <li>10. Friends</li> <li>97. Other (specify)</li> <li>98. I don't trust any of them</li> <li>99. Difficult to answer / I prefer not to say</li> </ol>                               | <p><b>21. Яким джерелам інформації про вакцинацію ви довіряєте найбільше? МОЖЛИВО ДЕКІЛЬКА ВІДПОДІДЕЙ</b></p> <ol style="list-style-type: none"> <li>1. Офіційні медичні установи</li> <li>2. Телебачення</li> <li>3. Радіо</li> <li>4. Газети</li> <li>5. Соціальні мережі</li> <li>6. YouTube</li> <li>7. Батьки інших дітей, що живуть у Польщі</li> <li>8. Лікарі</li> <li>9. Родина</li> <li>10. Друзі</li> <li>97. Інше (вказіть) _____</li> <li>98. Жодному не довіряю</li> <li>99. Важко відповісти / Не хочу відповідати</li> </ol>                                                                                               |
| <p><b>22. Which of the following has the greatest influence on your decision on whether to vaccinate your child, or NOT? MULTIPLE RESPONSE</b></p> <ol style="list-style-type: none"> <li>1. Family</li> <li>2. Friends</li> <li>3. Other parents</li> <li>4. Religious leaders</li> <li>5. Coworkers</li> <li>6. School</li> <li>7. Doctors or other healthcare workers</li> <li>8. Celebrities or other influencers</li> <li>9. Public health figures</li> <li>97. Other (specify)</li> <li>98. None</li> <li>99. Difficult to answer/Not sure</li> </ol> | <p><b>22. Хто з переліку найбільше впливає на ваше рішення вакцинувати або не вакцинувати дитину? МОЖЛИВО ДЕКІЛЬКА ВІДПОДІДЕЙ</b></p> <ol style="list-style-type: none"> <li>1. Родина/сім'я</li> <li>2. Друзі</li> <li>3. Батьки інших дітей, що живуть у Польщі</li> <li>4. Релігійні лідери</li> <li>5. Колеги по роботі</li> <li>6. Школа</li> <li>7. Лікарі або інші медичні працівники</li> <li>8. Знаменитості або інші впливові особистості</li> <li>9. Уповноважені працівники установ з охорони здоров'я</li> <li>97. Інше (вказіть) _____</li> <li>98. Ніхто з перелічених</li> <li>99. Важко відповісти/Не впевнена</li> </ol> |



|                                                                                                                                                                                                                                                                                                                                                                              |                                                                                                                                                                                                                                                                                                                                                                                |
|------------------------------------------------------------------------------------------------------------------------------------------------------------------------------------------------------------------------------------------------------------------------------------------------------------------------------------------------------------------------------|--------------------------------------------------------------------------------------------------------------------------------------------------------------------------------------------------------------------------------------------------------------------------------------------------------------------------------------------------------------------------------|
| <p><b>23. When your child needs medical care, where do you go?</b></p> <ol style="list-style-type: none"> <li>1. To a non-Ukrainian doctor in Poland</li> <li>2. To a Ukrainian doctor in Poland</li> <li>3. To a doctor in Ukraine</li> <li>4. I can't access health care</li> <li>99. I don't know</li> </ol>                                                              | <p><b>23. Коли вашій дитині потрібна медична допомога, куди Ви звертаєтесь?</b></p> <ol style="list-style-type: none"> <li>1. До польського лікаря у Польщі</li> <li>2. До українського лікаря у Польщі</li> <li>3. До лікаря в Україні</li> <li>4. Не маю доступу до медичних послуг</li> <li>99. Важко відповісти</li> </ol>                                                 |
| <p><b>24. Which of the following best describes your financial situation?</b></p> <ol style="list-style-type: none"> <li>1. Not enough</li> <li>2. Enough, but only for everyday expenses</li> <li>3. Mostly enough</li> <li>4. Enough for almost everything</li> <li>5. More than enough</li> <li>99. I prefer not to answer</li> </ol>                                     | <p><b>24. Що з наведеного найкраще описує ваше фінансове становище?</b></p> <ol style="list-style-type: none"> <li>1. Недостатньо коштів</li> <li>2. Достатньо лише на повсякденні витрати</li> <li>3. В основному достатньо</li> <li>4. Достатньо на майже все, що потрібно</li> <li>5. Більш ніж достатньо</li> <li>99. Не хочу відповідати</li> </ol>                       |
| <p><b>25. How likely are you to return to Ukraine permanently?</b></p> <ol style="list-style-type: none"> <li>1. I will return to Ukraine as soon as possible</li> <li>2. I'll probably return as soon as possible</li> <li>3. I probably WON'T return, even if it's possible</li> <li>4. I will not return in any case</li> <li>99. Difficult to answer/Not sure</li> </ol> | <p><b>25. Чи плануєте Ви повертатися в Україну на постійне проживання?</b></p> <ol style="list-style-type: none"> <li>1. Однозначно повернуся в найближчому часі</li> <li>2. Можливо повернуся в найближчому часі</li> <li>3. Скоріше НЕ повернуся, навіть якщо це буде можливо</li> <li>4. НЕ планую повертатися взагалі</li> <li>99. Важко відповісти/Не впевнена</li> </ol> |

|                                                                                                                                                                                                                                                                                                                                                                                                                                 |                                                                                                                                                                                                                                                                                                                                                                                                                                                          |
|---------------------------------------------------------------------------------------------------------------------------------------------------------------------------------------------------------------------------------------------------------------------------------------------------------------------------------------------------------------------------------------------------------------------------------|----------------------------------------------------------------------------------------------------------------------------------------------------------------------------------------------------------------------------------------------------------------------------------------------------------------------------------------------------------------------------------------------------------------------------------------------------------|
| <p><b>26. Do you have a PESEL number?</b></p> <p>1. Yes<br/>2. No<br/>99. I prefer not to answer</p>                                                                                                                                                                                                                                                                                                                            | <p><b>26. У вас є номер PESEL?</b></p> <p>1. Так<br/>2. Ні<br/>99. Важко відповісти</p>                                                                                                                                                                                                                                                                                                                                                                  |
| <p><b>27. INTERVENTION (one of the for messages below was presented)</b></p>                                                                                                                                                                                                                                                                                                                                                    | <p><b>27. ІНТЕРВЕНЦІЯ</b></p>                                                                                                                                                                                                                                                                                                                                                                                                                            |
| <p><b>27.1_TRUST</b> Read the following:</p> <p><i>Schedule routine vaccinations for your children while you are in Poland! Protect their health and shield them from vaccine preventable diseases.</i></p> <p><i>Polish health system has a strong immunization program, that has been successful in preventing serious diseases in children using the highest quality vaccines.</i></p> <p><b>GO TO THE NEXT QUESTION</b></p> | <p><b>27.1_TRUST</b> Прочитайте наступне:</p> <p><b>Запишіть своїх дітей на планові щеплення, поки ви перебуваєте у Польщі! Захистіть їх здоров'я та збережіть від захворювань, яким можна запобігти за допомогою вакцин.</b></p> <p><b>Система охорони здоров'я в Польщі має потужну програму імунізації, яка успішно запобігає серйозним захворюванням у дітей за допомогою найякісніших вакцин.</b></p> <p><b>ПЕРЕЙДІТЬ ДО НАСТУПНОГО ПИТАННЯ</b></p> |
| <p><b>27.2_ACCESS</b> Read the following:</p> <p><i>Schedule routine vaccinations for your children while you are in Poland! Protect their health and shield them from preventable diseases.</i></p> <p><i>Getting your child vaccinated in Poland is easy and convenient.</i></p> <p><b>GO TO THE NEXT QUESTION</b></p>                                                                                                        | <p><b>27.2_ACCESS</b> Прочитайте наступне:</p> <p><b>Запишіть своїх дітей на планові щеплення, поки ви перебуваєте в Польщі! Захистіть їх здоров'я та збережіть від захворювань, яким можна запобігти за допомогою вакцин.</b></p> <p><b>Зробити щеплення дитині в Польщі – це легко і зручно.</b></p>                                                                                                                                                   |

|                                                                                                                                                                                                                                                                                                                                                                           |                                                                                                                                                                                                                                                                                                                                                                                                         |
|---------------------------------------------------------------------------------------------------------------------------------------------------------------------------------------------------------------------------------------------------------------------------------------------------------------------------------------------------------------------------|---------------------------------------------------------------------------------------------------------------------------------------------------------------------------------------------------------------------------------------------------------------------------------------------------------------------------------------------------------------------------------------------------------|
|                                                                                                                                                                                                                                                                                                                                                                           | <p>ПЕРЕЙДІТЬ ДО НАСТУПНОГО ПИТАННЯ</p>                                                                                                                                                                                                                                                                                                                                                                  |
| <p><b>27.3_RISK</b> Read the following:</p> <p><i>Schedule routine vaccinations for your children while you are in Poland! Protect their health and shield them from preventable diseases.</i></p> <p><i>Vaccinating your child during emergency is more important than ever as your child might be more vulnerable to infections.</i></p> <p>GO TO THE NEXT QUESTION</p> | <p><b>27.3_RISK</b> Прочитайте наступне:</p> <p>Запишіть своїх дітей на планові щеплення, поки ви перебуваєте в Польщі! Захистіть їх здоров'я та збережіть від захворювань, яким можна запобігти за допомогою вакцин.</p> <p>Вакцинація вашої дитини під час війни важливіша, ніж будь-коли, оскільки в цей час діти можуть бути більш вразливі до інфекцій.</p> <p>ПЕРЕЙДІТЬ ДО НАСТУПНОГО ПИТАННЯ</p> |
| <p><b>27.4_CONTROL</b> Read the following:</p> <p><i>Dare to be healthy.</i></p> <p>GO TO THE NEXT QUESTION</p>                                                                                                                                                                                                                                                           | <p><b>27.4_CONTROL</b> Прочитайте наступне:</p> <p>Наважтеся бути здоровими.</p> <p>ПЕРЕЙДІТЬ ДО НАСТУПНОГО ПИТАННЯ</p>                                                                                                                                                                                                                                                                                 |

|                                                                                                                                                                                                                                                 |                                                                                                                                                                                                                                |
|-------------------------------------------------------------------------------------------------------------------------------------------------------------------------------------------------------------------------------------------------|--------------------------------------------------------------------------------------------------------------------------------------------------------------------------------------------------------------------------------|
| <p><b>BeSD Question (adapted)</b></p> <p><b>28. I think it's important to vaccinate my child</b></p> <p>0: I strongly disagree</p> <p>1</p> <p>2</p> <p>3</p> <p>4</p> <p>5</p> <p>6</p> <p>7</p> <p>8</p> <p>9</p> <p>10: I strongly agree</p> | <p><b>28. Чи погоджуєтеся Ви з тим, що вакцинувати свою дитину важливо?</b></p> <p>0: Зовсім не погоджуюся</p> <p>1</p> <p>2</p> <p>3</p> <p>4</p> <p>5</p> <p>6</p> <p>7</p> <p>8</p> <p>9</p> <p>10: Повністю погоджуюся</p> |
| <p><b>29. Do you intend to vaccinate your child in the next 6 months in Poland?</b></p> <p>1. Yes</p> <p>2. No</p> <p>99. Difficult to answer/Not sure</p>                                                                                      | <p><b>29. Чи маєте Ви намір вакцинувати свою дитину протягом наступних 6 місяців у Польщі?</b></p> <p>1. Так</p> <p>2. Ні</p> <p>99. Важко відповісти/Не впевнена</p>                                                          |
| <p><b>30. Do you think most of your close family and friends want you to get your child vaccinated?</b></p> <p>1. No</p> <p>2. Yes</p> <p>99. Difficult to answer/Not sure</p>                                                                  | <p><b>30. Як ви думаєте, більшість вашої родини та друзів хочуть, щоб Ваша дитина була вакцинована?</b></p> <p>1. Так</p> <p>2. Ні</p> <p>99. Важко відповісти/Не впевнена</p>                                                 |

**31. Behavioral outcome:**

*Click below and make an appointment to get your child vaccinated.*

*CLICK*

**31. Поведінковий експеримент:**

**Натисніть на посилання нижче та зареєструйтеся на прийом для вакцинації вашої дитини.**

**ЗАПИС НА ПРИЙОМ ДО ЛІКАРЯ**
